1     **A highly sensitive and specific SYBR Green quantitative polymerase chain**  
2     **reaction (qPCR) method for rapid detection of scale drop disease virus in**  
3             **Asian sea bass, *Lates calcarifer***

4  
5             Sukhontip Sriisan<sup>1,2</sup>, Chuenchit Boonchird<sup>1</sup>, Siripong Thitamadee<sup>1,2</sup>,

6             Molruedee Sonthi<sup>3,4</sup>, Ha Thanh Dong<sup>5</sup>, Saengchan Senapin<sup>1,2,6\*</sup>

7  
8     <sup>1</sup>Department of Biotechnology, Faculty of Science, Mahidol University, Bangkok, Thailand

9     <sup>2</sup>Center of Excellence for Shrimp Molecular Biology and Biotechnology (Centex Shrimp),

10    Faculty of Science, Mahidol University, Bangkok, Thailand

11    <sup>3</sup>Faculty of Marine Technology, Burapha University Chanthaburi Campus, Chanthaburi,

12    Thailand

13    <sup>4</sup>Aquatic Animal Disease Diagnostics and Immunology Research Unit, Burapha University

14    Chanthaburi Campus, Chanthaburi, Thailand

15    <sup>5</sup>Faculty of Science and Technology, Suan Sunandha Rajabhat University, Bangkok, Thailand

16    <sup>6</sup>National Center for Genetic Engineering and Biotechnology (BIOTEC), National Science and

17    Technology Development Agency (NSTDA), Pathum Thani, Thailand

18    \*Corresponding author: S.Senapin (saengchan@biotec.or.th)

19  
20  
21    **Highlights**

- 22     • This study developed a SYBR Green qPCR assay for rapid detection of SDDV
- 23     • The developed qPCR assay is specific for SDDV with limit of detection of 2 viral copies
- 24         per reaction
- 25     • The assay could detect the virus from subclinically infected fish with low viral load
- 26     • We recommend this qPCR assay for active surveillance and early screening of SDDV

## 27 **Abstract**

28 Scale drop disease virus (SDDV) is a novel *Megalocytivirus* causing scale drop disease (SDD) in  
29 Asian sea bass in Southeast Asia. In order to support disease diagnosis and surveillance, the present  
30 study developed a highly sensitive and specific SYBR Green qPCR assay for rapid detection of  
31 SDDV. Specific primers targeting a 135-bp fragment of *ATPase* coding gene of the SDDV genome  
32 were newly designed and subsequent gradient PCR assays were conducted to investigate their  
33 optimal annealing temperature. The optimized qPCR assay could detect as low as 2 viral copies  
34 per reaction and showed no cross amplification with DNA extracted from 12 viruses and bacteria  
35 commonly found in aquatic animals. The SDDV *ATPase* qPCR method was subsequently  
36 validated with field samples (n=86). The results revealed that all clinically sick fish (n=34) from  
37 5 affected farms gave positive results. Interestingly, 30/52 samples of apparently healthy fish from  
38 8 unaffected farms which previously tested negative for SDDV by semi-nested PCR assay were  
39 positive by the newly developed qPCR method. This suggested that qPCR method is highly  
40 sensitive and suitable for early screening of SDDV from clinically healthy fish and for disease  
41 confirmation of sick fish. Investigation of tissue tropism and viral load of SDDV revealed systemic  
42 viral infection with relatively high viral load ( $8 \times 10^2$  to  $6.8 \times 10^4$  copies per 200 ng of DNA  
43 template) in all 9 tested organs including eyes, brain, fin, gills, kidney, liver, kidney, spleen, and  
44 muscle. The newly developed qPCR method in this study delivered an accurate and reliable  
45 method for rapid detection of SDDV that may facilitate active surveillance and prevent widespread  
46 of the virus.

47 **Keywords:** *ATPase*, Scale drop disease, *Lates calcarifer*, SDDV, qPCR

48

## 49 **1. Introduction**

50 Scale drop syndrome (SDS) in Asian sea bass, *Lates calcarifer*, was first reported in Southeast  
51 Asia by Gibson-Kueh et al. (2012). The clinical symptoms of the diseased fish were characterized  
52 by darkened bodies, scale loss, tail and fin erosion, gills pallor, and sometimes exophthalmia  
53 (Gibson-Kueh et al., 2012). The cumulative mortality was estimated around 40-50% in natural  
54 disease outbreaks. Subsequently, the causative agent of SDS was identified as scale drop disease  
55 virus (SDDV), a novel member of the genus *Megalocytivirus* (de Groof et al., 2015). Based on  
56 transmission electron microscope, SDDV virions are icosahedral with diameter of approximately

57 140 nm, which is a common characteristic of viruses in the family *Iridoviridae*. SDDV is a double-  
58 stranded DNA virus with known incomplete genome of about 124 kb containing at least 129 open  
59 reading frames (de Groof et al., 2015).

60 The disease has been reported in a number of countries in Southeast Asia recently including  
61 Malaysia, Singapore, Indonesia and Thailand (de Groof et al., 2015; Senapin et al., 2019).  
62 However, presence of the virus in the region was linked to mortalities since 1992 with similar  
63 clinical signs but probably misdiagnosed as other pathogen infection(s) (de Groof et al., 2015).  
64 Rapid detection method is critically important for disease diagnosis and selection of SDDV-free  
65 fish for aquaculture as well as prevention of widespread of the virus. Up-to-date, several PCR  
66 methods have been developed including patented conventional PCR and probe-based qPCR  
67 protocols (Guelen et al., 2014; de Groof et al., 2015), publicly accessible semi-nested PCR and  
68 loop-mediated isothermal amplification (LAMP) assay (Charoenwai et al., 2019; Dangtip et al.,  
69 2019). This study aimed to develop a highly sensitive SYBR Green-based qPCR method for the  
70 specific detection of SDDV from not only clinically sick fish but also inapparently infected fish, in  
71 order to facilitates active surveillance program for Asian sea bass farming countries in Southeast  
72 Asia and elsewhere.

73

## 74 **2. Materials and methods**

### 75 **2.1 DNA samples from Asian sea bass**

76 DNA samples from kidney or liver of Asian sea bass (*Lates calcarifer*) with or without clinical  
77 signs of scale drop disease were obtained from our previous studies (Senapin et al., 2019;  
78 Charoenwai et al., 2019). Fish samples were collected from different farms during 2016-2018.  
79 Additional 3 samples with scale drop clinical signs were recently obtained in 2019 and included  
80 in the present study. Thus, a total number of 86 fish DNA samples were used in this study as listed  
81 in Table 1.

82

### 83 **2.2 Primer design**

84 qPCR primers for SDDV detection were designed based on an *ATPase* (adenosine triphosphatase)  
85 coding gene of the SDDV genome sequences in the GenBank database using Primer 3 online  
86 software (Untergasser et al., 2012; Koressaar et al., 2007). Primers qSDDV-AF: 5'- AAT GAC

87 CGA AAT ACG ACC GAG AAC -3' and qSDDV-AR: 5'- GCG GGG ATC AAA TGT CGT  
88 TTT G-3' yielding an amplicon of 135 bp (Fig. S1) were synthesized by Bio Basic Inc. Specificity  
89 of the primers was preliminarily tested *in silico* using Primer-BLAST program  
90 (<https://www.ncbi.nlm.nih.gov/tools/primer-blast/>).

91

### 92 **2.3 Gradient PCR assay**

93 To determine the optimal temperature of the designed qPCR primers, gradient PCR reactions were  
94 performed using annealing temperature ranging from 55 to 65 °C. The reaction mixture of 20 µl  
95 contained 200 ng of DNA extracted from SDDV-infected fish, 1x PCRBIO buffer (containing 3  
96 mM MgCl<sub>2</sub>, 1 mM dNTPs, and manufacturer's enhancer and stabilizers), 0.25 unit of PCRBIO  
97 *Taq* polymerase (PCRBIOSYSTEMS, cat.no. PB10.11-05) and 150 µM of each primer. The  
98 cycling conditions consisted of denaturation at 95°C for 30 s followed by 30 cycles of 55-65 °C  
99 for 15 s and 72°C for 15 s (Biometra machine). Gradient PCR products were then analyzed by  
100 agarose gel electrophoresis.

101

### 102 **2.4 DNA cloning and sequence analysis**

103 Expected products of SDDV *ATPase* fragment amplification (135 bp) obtained from the above  
104 PCR assays were cloned into pGEM-T easy vector (Promega) and transformed into *E. coli* XL-1  
105 Blue competent cells. Recombinant plasmid with the desired insert size was sent for DNA  
106 sequencing by Macrogen (South Korea). Plasmid DNA was used as positive control and used in  
107 qPCR sensitivity assay. Representative qPCR amplicons later found from positive test samples  
108 were also subjected to DNA cloning and sequencing in the same manner. Multiple sequence  
109 alignment of the obtained sequences was conducted using Clustal Omega (Sievers et al., 2011).

110

### 111 **2.5 Optimization of SDDV qPCR conditions**

112 The SDDV qPCR assay was performed using KAPA SYBR FAST Master Mix ABI Prism  
113 (KAPABIOSYSTEMS, cat. no. KM4603). A reaction of 20 µl contained 1x master mix, 150 or  
114 200 nM of each forward and reverse primer, 2 µl of DNA template and molecular-grade water to  
115 adjust the final volume. The cycling conditions consisted of denaturation at 95°C for 3 min  
116 followed by 40 cycles of 95°C for 3 s and 60 or 63°C for 30 s (ABI 7500 instrument). At the end  
117 of the PCR amplification, melting curve analysis was performed.

118

## 119 **2.6 Efficiency of amplification, detection sensitivity, and reproducibility**

120 The optimized qPCR conditions obtained above were subjected to investigation of i) the efficiency  
121 of amplification (E) of the designed primer pair, ii) detection sensitivity, and iii) reproducibility  
122 test by intra- and inter-assays. These were done using 10-fold serial dilutions of the SDDV *ATPase*  
123 control plasmid. The concentration of plasmid used was ranged from 2 to  $2 \times 10^6$  copies per  
124 reaction. Additionally, 100 ng of DNA extracted from SDDV-free Asian sea bass was spiked in  
125 each qPCR reaction to mimic real detection assays. Standard curves were prepared by plotting the  
126 log of concentrations of plasmid versus threshold cycle (Ct) values. Amplification efficiency, E  
127 was then determined using the slope of the graph with the equation  $E = 10^{[-1/\text{slope}]}$  (Pfaffl, 2001).  
128 With respect to detection sensitivity assay, detection limit of SDDV qPCR assay was determined  
129 from the minimum copy number that can still be detected. For reproducibility test, the intra-  
130 and inter-assays were performed in 3 replicates.

131

## 132 **2.7 Specificity test**

133 Specificity test of the newly developed SDDV qPCR assay was performed against DNA samples  
134 prepared from 12 pathogens commonly found in aquatic animals. DNA extracted from 10 bacteria  
135 (*Vibrio harveyi*, *V. parahaemolyticus*, *V. vulnificus*, *V. tubiashi*, *V. alginolyticus*, *V. cholera*,  
136 *Streptococcus iniae*, *Tenacibaculum litopenaei*, *Pleisiomonas shigelloides*, and *Nocardia seriolae*)  
137 and DNA extracted from fish infected with 2 viruses (nervous necrosis virus (NNV) and infectious  
138 spleen and kidney necrosis virus (ISKNV)) were used as template. Details of the pathogens used  
139 in the specificity assay were described previously (Charoenwai et al., 2019). DNA extracted from  
140 clinically healthy Asian sea bass were also included in the assays. Positive and negative controls  
141 were reactions containing SDDV-infected fish DNA as template and water instead of DNA,  
142 respectively.

143

## 144 **2.8 Detection of SDDV in clinical samples and analysis of viral loads**

145 The qPCR condition was later employed for SDDV detection in DNA samples extracted from  
146 Asian sea bass tissues. 86 fish samples mentioned above were subjected to the detection. For  
147 quantitative analysis of SDDV viral loads in infected fish tissues, 3 fish samples collected in the  
148 year 2019 whose 8 different tissues had been preserved were used for investigation. Total DNA

149 was extracted from eye, brain, fin, gills, kidney, liver, spleen, and muscle using a conventional  
150 phenol/ chloroform extraction and ethanol precipitation method. Viral copy numbers were  
151 calculated by extrapolating the Ct values to the standard curve generated as described above.

152

### 153 **3. Results**

#### 154 **3.1 SDDV qPCR condition optimization**

155 Initial gradient PCR assays indicated that annealing temperature (Ta) ranging from 55 °C to 65 °C  
156 could be used for the designed qPCR primers. It was evidenced by the fact that SDDV infected  
157 fish yielded a specific band of 135 bp with similar band intensity (Fig. S2). However, when Ta of  
158 60 and 63 °C was separately applied in SDDV qPCR assays, the melt curve analysis results  
159 revealed non-specific products probably being derived from primer-dimer formation (Fig. S2).  
160 Then, Ta of 63 °C was used but the primer concentration was reduced from 200 to 150 nM.  
161 Consequently, specific amplification was then obtained as demonstrated by a single uniform  
162 melting peak (Fig. S2). In conclusion, the optimized SDDV qPCR reaction of 20 µl contained 1x  
163 KAPA SYBR FAST master mix, 150 nM of each qSDDV-AF and qSDDV-AR primers, and 2 µl  
164 of DNA template. The cycling conditions run on ABI 7500 instrument consisted of denaturation  
165 at 95°C for 3 min followed by 40 cycles of 95°C for 3 s and 63°C for 30 s with subsequent melt  
166 curve analysis.

167

#### 168 **3.2 Amplification efficiency and detection sensitivity of SDDV qPCR assay**

169 For detection sensitivity assay, an optimized SDDV qPCR condition above was run using 10-fold  
170 serially diluted SDDV control plasmid plus spiked fish DNA. It was found that the detection limit  
171 of the newly developed SDDV qPCR detection was 1 copy/µl template or 2 copies/reaction (Fig.  
172 1a). The conditions were optimized after observing the uniform melting peaks ( $T_m$   $80.8 \pm 0.15$   
173 °C) without detectable non-specific products (Fig. 1b). The resulting constructed standard curve  
174 (Fig. 1c) was then used for analysis of the amplification efficiency (E). With a slope of -3.115 ( $R^2$   
175 0.996), E of the SDDV qPCR developed in this study was 2.094, indicating a practical  
176 amplification assay.

177

#### 178 **3.3 Reproducibility of SDDV qPCR assay**

179 The reproducibility of the SDDV qPCR assay was characterized by analysis of intra- and inter-  
180 assay variations. The assays were performed using 10-fold serial dilutions of control plasmid  
181 containing SDDV *ATPase* gene fragment with 3 replicates. The results shown in Table 2 indicated  
182 that percent coefficient of variation (%CV) of the intra- and inter-assays were 0.24 to 0.70% with  
183 SD values ranging from 0.06-0.21 and 0.63 to 2.13% with SD values of 0.17-0.78, respectively.  
184 The analysis indicated the precision of results between different assays. It was also noted that the  
185 mean Ct value ranges were 35.76 to 17.38 (intra-assay) and 36.73 to 17.19 (inter-assay) when  
186 assayed with serial dilutions of control plasmid from  $2 \times 10^6$  to 2 plasmid copy numbers (Table 2).  
187

### 188 **3.4 Specificity test of SDDV qPCR detection method**

189 DNA samples prepared from 12 pathogens commonly found in aquatic animals consisting of 10  
190 bacteria and 2 viruses were subjected to specificity test. DNA extracted from SDDV-infected fish  
191 and a clinically healthy fish was used in positive and negative control reactions, respectively. The  
192 result shown in Fig. 2 indicated that specific detection was obtained from only the SDDV-infected  
193 sample and no cross amplification with other pathogens or DNA from healthy fish was observed.  
194

### 195 **3.5 Detection of SDDV in clinical samples**

196 The established SDDV qPCR condition was employed to investigate the presence of SDDV in the  
197 samples collected from different farms in 2016-2019 (Table 1). A total number of 86 fish samples  
198 were obtained from 34 scale drop diseased or unknown diseased fish and 52 healthy looking Asian  
199 sea bass. This set of samples was previously tested using semi-nested PCR method (Charoenwai  
200 et al., 2019) and found that all the diseased fish were SDDV positive while the clinically healthy  
201 fish were tested negative for SDDV. Interestingly, the qPCR detection result shown in Table 1  
202 indicated that 30 out of the 52 healthy looking fish were SDDV positive (Ct values ranging from  
203 29.95-37.02). As expected, all of the 34 sick fish were confirmed to be SDDV infected by qPCR  
204 (Ct values ranging from 19.07-28.73). Five representative 135-bp amplicons from positive samples  
205 obtained from 5 farms (1, 8, 9, 10, and 11) were subjected to cloning and sequencing. DNA  
206 sequence analysis revealed high identity (98.52-100%) to the sequence of SDDV Singapore isolate  
207 deposited in the database (KR139659)(Fig. 3).  
208

### 209 **3.6 Detection of SDDV in different fish tissues**

210 In this study, 3 SDDV-infected fish collected in 2019 were subjected to investigation of tissue  
211 tropism of SDDV infection. DNA from 8 different tissues including eye, brain, fin, gills, kidney,  
212 liver, spleen, and muscle of individual fish were tested using our newly developed SDDV qPCR  
213 protocol. The results showed that all of the tested tissues were infected with SDDV with the viral  
214 loads ranging from  $8.0 \times 10^2$  to  $6.8 \times 10^4$  viral copies/200 ng of DNA template (Table 3). Brain,  
215 fin, gills, and muscle seem to have relatively higher viral load ( $6.4 \times 10^3$  to  $6.8 \times 10^4$ ) when compared  
216 to the rest of other organs ( $8.0 \times 10^2$  to  $3.7 \times 10^4$ ).

217

#### 218 **4. Discussion**

219 Molecular diagnosis of SDDV from clinically sick fish could employ only a single PCR assay due  
220 to high viral load in the infected tissues (Senapin et al., 2019). However, single PCR or even nested  
221 PCR assays sometimes resulted in false negative detection for the samples that have viral load  
222 under detection limit of the methods. In aquatic animal culture, there is possibly a large proportion  
223 of viral infections in subclinical form that did not exhibit abnormal clinical signs (Senapin et al.,  
224 2018; Jeamkunakorn et al., 2019). Thus, accurate and sensitive diagnosis for these samples  
225 requires the assays which can detect as low as 1-2 viral copies per reaction to avoid false negative  
226 results, especially for live fish which are being translocated and destined for aquaculture.

227

228 The newly established qPCR assay described in this study is highly specific to SDDV and could  
229 detect down to 2 copies per reaction which is 100 times more sensitive than our previous semi-  
230 nested PCR and LAMP protocols (Charoenwai et al., 2019; Dangtip et al., 2019), and 25 times  
231 more sensitive than a previously probe-based qPCR detection (de Groof et al., 2015). When  
232 applied to detection of clinically healthy fish from unaffected farms, it was revealed that ~57.7%  
233 (30/52) samples previously tested negative by semi-nested PCR were positive by qPCR, indicating  
234 that the newly established qPCR is suitable for detection of SDDV from subclinically infected fish  
235 populations. Thus, we recommend the SDDV *ATPase* qPCR method should be considered for  
236 active surveillance program and quarantine inspection to prevent widespread of the pathogen. For  
237 farmers, this sensitive qPCR method might be useful for selection of SDDV-tested negative seeds  
238 before stocking to avoid the risk of disease outbreak.

239



240 Analysis of viral load of SDDV in different tissues of the infected fish revealed presence of the  
241 virus in all 8 tested tissues (eye, brain, fin, gills, kidney, liver, spleen, and muscle). This suggested  
242 that SDDV caused systemic infection and the viral load seemed to be relatively higher in the brain,  
243 fin, gills, and muscle when compared to other organs. This finding might suggest potential use of  
244 fin and gills as target organs for non-lethal detection of SDDV. However, it is not certain whether  
245 these organs are suitable for detection in case of subclinically infected fish with presumably low  
246 viral load. Thus, further investigation on comparative viral load of SDDV in different infection  
247 levels is required as basic knowledge for development of non-lethal sampling methods, especially  
248 for high value broodfish.

249

250 Moreover, it is worthwhile to investigate further whether SDDV invades the reproductive organs  
251 of Asian sea bass broodfish and could vertically transmit to the offspring as occurred in the case  
252 of tilapia lake virus (TiLV), a newly emerging virus of tilapia (Dong et al., 2020; Yamkasem et  
253 al., 2019). Understanding the route of disease transmission in combination with highly sensitive  
254 detection method is vital for effective disease management and preventing potential widespread.

255

256 In conclusion, this study has developed a highly sensitive qPCR method for the specific detection  
257 of SDDV in Asian sea bass with detection limit of 2 viral copies per reaction. The method was  
258 able to detect SDDV in both clinically sick fish and inapparently (asymptomatic) infected fish.  
259 Thus, qPCR protocol developed in this study might be a useful tool for SDDV diagnosis and  
260 surveillance.

261

## 262 **Conflict of interest**

263 The authors declare no conflict of interest.

264

## 265 **Acknowledgements**

266 This work was supported by BIOTEC fellow's research grant P-19-50170. S. Sriisan is the  
267 recipient of a Thailand Graduate Institute of Science and Technology (TGIST), NSTDA  
268 scholarship. The authors would like to thank Ms. O. Charoenwai and Mr. W. Meemetta for skilled  
269 technical assistance.

270

271 **References**

- 272 Charoenwai, O., Meemetta W., Sonthi, M., Dong, H.T., Senapin, S., 2019. A validated semi-nested  
273 PCR for rapid detection of scale drop disease virus (SDDV) in Asian sea bass (*Lates*  
274 *calcarifer*). J Virol Methods. 268, 37-41.
- 275 Dangtip, S., Kampeera, J., Suvannakad, R., Khumwan, P., Jaroenram, W., Sonthi, M., Senapin, S.,  
276 Kiatpathomchai, W., 2019. Colorimetric detection of scale drop disease virus in Asian sea  
277 bass using loop-mediated isothermal amplification with xyleneol orange. Aquaculture. 510,  
278 386-391.
- 279 de Groof, A., Guelen, L., Deijs, M., Van Der Wal, Y., Miyata, M., Ng, K.S., Van Grinsven, L.,  
280 Simmelink, B., Biermann, Y., Grisez, L., Van Lent, J., De Ronde, A., Chang, S.F., Schrier,  
281 C., Van Der Hoek, L., 2015. A novel virus causes scale drop disease in *Lates calcarifer*. PLoS  
282 Pathog, 11, e1005074.
- 283 Dong, H.T., Senapin, S., Gangnonngiw, W., Nguyen, V.V., Rodkhum, C., Debnath, P.P.,  
284 Deboutteville, J.D., Mohan, C.V., 2020. Experimental infection reveals transmission of  
285 tilapia lake virus (TiLV) from tilapia broodstock to their reproductive organs and fertilized  
286 eggs. Aquaculture. <https://doi.org/10.1016/j.aquaculture.2019.734541>.
- 287 Gibson-Kueh, S., Chee, D., Chen, J., Wang, Y.H., Tay, S., Leong, L.N., Ng, M.L., Jones, J.B.,  
288 Nicholls, P.K., Ferguson, H.W., 2012. The pathology of 'scale drop syndrome' in Asian  
289 seabass, *Lates calcarifer* Bloch, a first description. J. Fish Dis. 35, 19-27.
- 290 Guelen L., de Groof A., Schrier, C.C., Grisez, L., Chang, S.F., Miyata M., Van Der Hoek, C.M.,  
291 Deijs, M., Ng, K.S., 2014. Scale drop disease (SDD) causative virus and derivatives thereof  
292 International publication number WO2014/191445 A1.
- 293 Jeamkunakorn, C., Machimbirike, V.I., Senapin, S., Khunrae, P., Dong, H.T., Rattanarojpong, T.,  
294 2019. Blood and liver biopsy for nondestructive screening of tilapia lake virus. J Fish Dis. 42,  
295 1629-1636.
- 296 Pfaffl, M.W., 2001. A new mathematical model for relative quantification in real-time RT-PCR.  
297 Nucleic Acids Res 29, e45.
- 298 Senapin, S., Shyam, K.U., Meemetta, W., Rattanarojpong, T., Dong, H.T., 2018. Inapparent  
299 infection cases of tilapia lake virus (TiLV) in farmed tilapia. Aquaculture. 487: 51-55.

- 300 Senapin, S., Dong, H.T., Meemetta, W., Gangnonngiw, W., Sangsuriya, P., Vanichviriyakit, R.,  
301 Sonthi, M., Nuangsaeng, B., 2019. Mortality from scale drop disease in farmed *Lates*  
302 *calcarifer* in Southeast Asia. *J. Fish Dis.* 42, 119–127.
- 303 Sievers, F., Wilm, A., Dineen, D., Gibson, T.J., Karplu,s K., Li, W., Lopez, R., McWilliam, H.,  
304 Remmert, M., Söding, J., Thompson, J.D., Higgins, D.G., 2011. Fast, scalable generation of  
305 high-quality protein multiple sequence alignments using Clustal Omega. *Mol. Syst. Biol.* 7,  
306 539.
- 307 Untergasser, A., Cutcutache, I., Koressaar, T., Ye, J., Faircloth, B.C., Remm, M., Rozen, S.G.,  
308 2012. Primer3 - new capabilities and interfaces. *Nucleic Acids Res.* 40:e115.
- 309 Koressaar, T., Remm, M., 2007. Enhancements and modifications of primer design program  
310 Primer3. *Bioinformatics* 23, 1289-1291.
- 311 Yamkasem, J., Tattiyapong, P., Kamlangdee, A., Surachetpong, W., 2019. Evidence of potential  
312 vertical transmission of tilapia lake virus. *J. Fish Dis.* 42, 1293-1300.

313 **Tables and Figures**

314 **Table 1** Details of fish samples used in this study and the test results

| Year         | Farm    | Fish health status                 | Positive sample/Number of tested samples |                          |
|--------------|---------|------------------------------------|------------------------------------------|--------------------------|
|              |         |                                    | Semi-nested PCR*                         | qPCR                     |
| 2016         | Farm 1  | Sick fish with scale drop symptoms | 18/18                                    | 18/18 <sup>#</sup>       |
|              | Farm 2  | Unknown diseased fish              | 6/6                                      | 6/6                      |
| 2017         | Farm 3  | Sick fish with scale drop symptoms | 5/5                                      | 5/5                      |
|              | Farm 4  | Clinically healthy fish            | 0/12                                     | 8/12                     |
|              | Farm 5  | Clinically healthy fish            | 0/80                                     | 1/5                      |
|              | Farm 6  | Clinically healthy fish            | 0/10                                     | 0/5                      |
|              | Farm 6  | Clinically healthy fish            | 0/10                                     | 5/5                      |
|              | Farm 8  | Clinically healthy fish            | 0/10                                     | 1/5 <sup>#</sup>         |
|              | Farm 9  | Clinically healthy fish            | 0/10                                     | 5/5 <sup>#</sup>         |
|              | Farm 10 | Clinically healthy fish            | 0/5                                      | 5/5 <sup>#</sup>         |
|              | Farm 11 | Clinically healthy fish            | 0/10                                     | 2/5 <sup>#</sup>         |
|              | Farm 12 | Clinically healthy fish            | 0/13                                     | 3/5                      |
| 2018         | Farm 13 | Sick fish with scale drop symptoms | 2/2                                      | 2/2                      |
| 2019         | Farm 14 | Sick fish with scale drop symptoms | Not done                                 | 3/3                      |
| <b>Total</b> |         |                                    | <b>31/191<br/>(16.2%)</b>                | <b>64/86<br/>(74.4%)</b> |

315

316 \*, previous results from Charoenwai et al., 2019

317 #, one positive amplicon from indicated sample set was subjected to DNA sequence analysis

318

319 **Table 2** Reproducibility test of SDDV qPCR detection by intra- and inter-assay with 3 replicates  
 320 each. 10-fold serial dilution of SDDV *ATPase* control plasmid was used as template

321

| Plasmid copy number /reaction | Intra-assay |      |      | Inter-assay |      |      |
|-------------------------------|-------------|------|------|-------------|------|------|
|                               | Mean Ct     | SD   | %CV  | Mean Ct     | SD   | %CV  |
| $2 \times 10^6$               | 17.38       | 0.08 | 0.45 | 17.19       | 0.23 | 1.36 |
| $2 \times 10^5$               | 20.57       | 0.12 | 0.56 | 20.51       | 0.18 | 0.91 |
| $2 \times 10^4$               | 24.25       | 0.06 | 0.24 | 24.11       | 0.21 | 0.85 |
| $2 \times 10^3$               | 26.52       | 0.10 | 0.38 | 26.35       | 0.17 | 0.65 |
| $2 \times 10^2$               | 30.23       | 0.21 | 0.70 | 30.12       | 0.29 | 0.97 |
| 20                            | 33.62       | 0.19 | 0.56 | 33.84       | 0.21 | 0.63 |
| 2                             | 35.76       | 0.17 | 0.48 | 36.73       | 0.78 | 2.13 |

322

323 **Table 3** Analysis of SDDV viral loads in different fish tissues

| Fish number | Viral loads (copies/200 ng of DNA template) |                   |                   |                   |                   |                   |                   |                   |
|-------------|---------------------------------------------|-------------------|-------------------|-------------------|-------------------|-------------------|-------------------|-------------------|
|             | Eye                                         | Brain             | Fin               | Gills             | Kidney            | Liver             | Spleen            | Muscle            |
| 1           | $3.7 \times 10^4$                           | $2.7 \times 10^4$ | $6.6 \times 10^3$ | $2.5 \times 10^4$ | $1.7 \times 10^4$ | $8.5 \times 10^3$ | $2.1 \times 10^4$ | $1.8 \times 10^4$ |
| 2           | $9.4 \times 10^2$                           | $1.6 \times 10^4$ | $1.3 \times 10^4$ | $6.6 \times 10^3$ | $8.0 \times 10^2$ | $9.4 \times 10^2$ | $6.4 \times 10^3$ | $4.2 \times 10^3$ |
| 3           | $1.5 \times 10^4$                           | $1.8 \times 10^4$ | $1.0 \times 10^4$ | $6.8 \times 10^4$ | $5.3 \times 10^3$ | $4.7 \times 10^3$ | $6.1 \times 10^3$ | $4.2 \times 10^4$ |

324

325

326

327

### a) Amplification plot

328

329

330

331

332

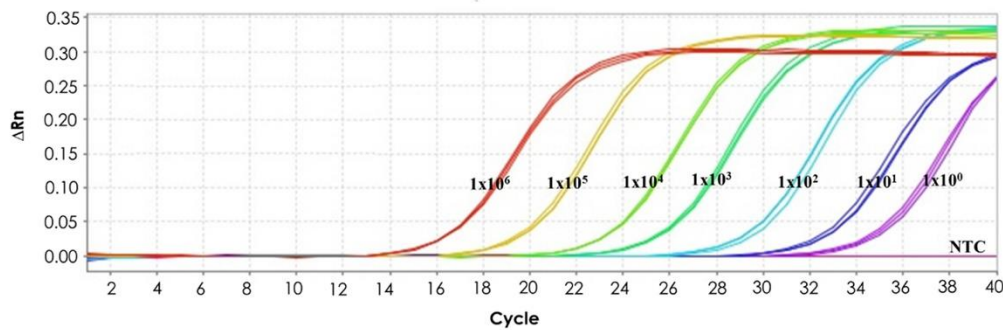

333

### b) Melt curve analysis

334

335

336

337

338

339

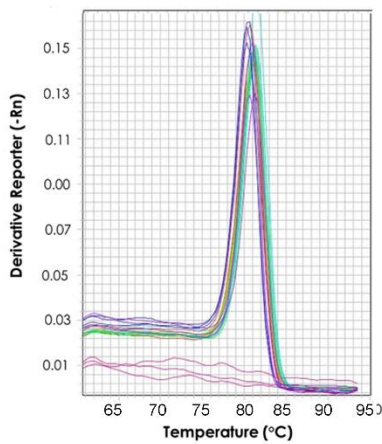

### c) Standard curve

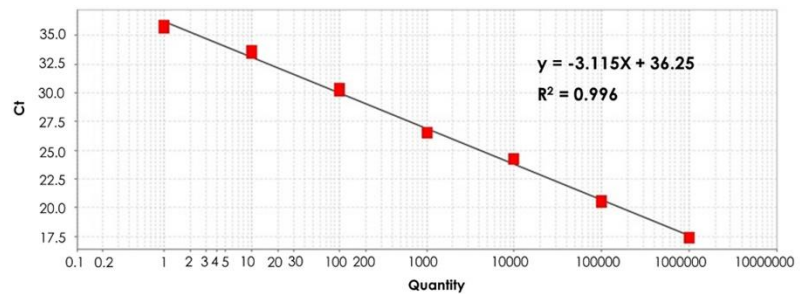

340

**Figure 1** Development of SDDV qPCR assay. (a) Amplification plot of 10-fold serial dilution (1

341 to 10<sup>6</sup> copies/μl) of positive control plasmid containing SDDV *ATPase* gene fragment. NTC, no

342 template control. Experiment was performed in 3 replicates. (b) Melt curve analysis of the

343 amplified amplicons obtained in (a) revealing uniform melt peaks of 80.8 ± 0.15 °C. (c) Standard

344 curve derived by plotting between Ct values versus log concentration of plasmid copy number

345 used in (a).

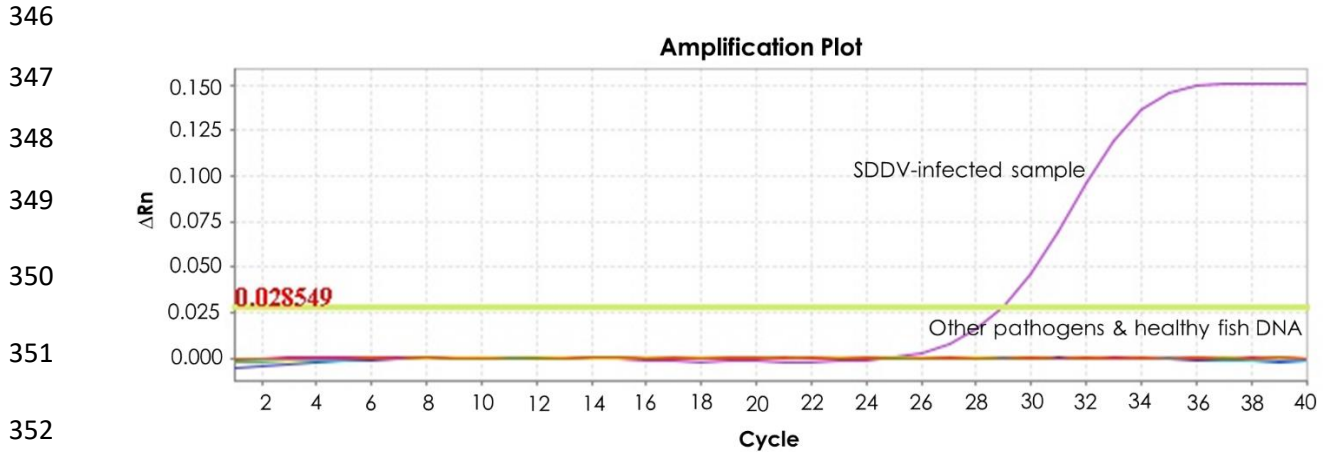

**Figure 2** Specificity test of the SDDV qPCR assay. The test was performed using DNA extracted from an SDDV-infected fish, a healthy fish, and 12 bacterial and viral pathogens commonly found in aquatic animals. Details of pathogens are in materials and methods section.

|         |                                                               |     | % identity with SDDV_SG |
|---------|---------------------------------------------------------------|-----|-------------------------|
| SDDV_SG | AATGACCGAAATACGACCGAGAACACACGACGATGAAATCGGAGGGATGAAATTGGTTGT  | 60  | NA                      |
| Farm_1  | AATGACCGAAATACGACCGAGAACACACGACGATGAAATCGGAGGGATGAAATTGGTTGT  | 60  | 100                     |
| Farm_8  | AATGACCGAAATACGACCGAGAACACACGACGATGAAATCGGAGGGATGAAATTGGTTGT  | 60  | 99.26                   |
| Farm_9  | AATGACCGAAATACGACCGAGAACACGCGACGATGAAATCGGAGGGATGAAATTGGTTAT  | 60  | 98.52                   |
| Farm_10 | AATGACCGAAATACGACCGAGAACACGCGACGATGAAATCGGAGGGATGAAATTGGTTAT  | 60  | 98.52                   |
| Farm_11 | AATGACCGAAATACGACCGAGAACACACGACGATGAAATCGGAGGGATGAAATTGGTTGT  | 60  | 99.26                   |
|         | *****                                                         |     |                         |
|         | TTTGGGCAAACCGGGCCGTGGAAAATCGGTCTTGATAAAAATCGATAATAGCATCAAACG  | 120 |                         |
|         | TTTGGGCAAACCGGGCCGTGGAAAATCGGTCTTGATAAAAATCGATAATAGCATCAAACG  | 120 |                         |
|         | TTTGGGCAAACCGGGCCGTGGAAAATCGGTCTTGATAAAAATCGATAATAGCACCAAAACG | 120 |                         |
|         | TTTGGGCAAACCGGGCCGTGGAAAATCGGTCTTGATAAAAATCGATAATAGCATCAAACG  | 120 |                         |
|         | TTTGGGCAAACCGGGCCGTGGAAAATCGGTCTTGATAAAAATCGATAATAGCACCAAAACG | 120 |                         |
|         | *****                                                         |     |                         |
|         | ACATTTGATCCCCGC                                               | 135 |                         |
|         | ACATTTGATCCCCGC                                               | 135 |                         |
|         | ACATTTGATCCCCGC                                               | 135 |                         |
|         | ACATTTGATCCCCGC                                               | 135 |                         |
|         | ACATTTGATCCCCGC                                               | 135 |                         |
|         | ACATTTGATCCCCGC                                               | 135 |                         |
|         | *****                                                         |     |                         |

**Figure 3** Nucleotide sequence alignment of 135-bp SDDV *ATPase* partial gene fragments. Sequences from representative amplicons from SDDV qPCR positive test samples obtained in this study (5 different farms) were compared to that of SDDV Singapore isolate retrieved from GenBank database (KR139659). % identity to the Singapore isolate is shown on the right panel.

|     |         |                                                              |     |
|-----|---------|--------------------------------------------------------------|-----|
| 369 | SDDV_TH | ATGTCGTCTCCTGTGAAGGAATTGTCAATGACCGAAATACGACCGAGAACACACGACGAT | 60  |
|     | SDDV_SG | ATGTCGTCTCCTGTGAAGGAATTGTCAATGACCGAAATACGACCGAGAACACACGACGAT | 60  |
| 370 |         | *****<br>M S V P V K E L S M T E I R P R T H D D             |     |
| 371 | SDDV_TH | GAAATCGGAGGGATGAAATTGGTTGTTTGGGCAAACCGGGCCGTGAAAAATCGGTCTTG  | 120 |
|     | SDDV_SG | GAAATCGGAGGGATGAAATTGGTTGTTTGGGCAAACCGGGCCGTGAAAAATCGGTCTTG  | 120 |
|     |         | *****<br>E I G G M K L V V L G K P G R G K S V L             |     |
| 372 | SDDV_TH | ATAAAATCGATAATAGCATCAAACGACATTGATCCCGCAGCGGTTGTCATTCTGGT     | 180 |
|     | SDDV_SG | ATAAAATCGATAATAGCATCAAACGACATTGATCCCGCAGCGGTTGTCATTCTGGT     | 180 |
|     |         | *****<br>I K S I I A S K R H L I P A A V V I S G             |     |
| 373 | SDDV_TH | TCAGAAGAAGCCAAATCATTTCTATTCTGGGTTAGTTCAGAAATGTTACATTTATCCAAA | 240 |
|     | SDDV_SG | TCAGAAGAAGCCAAATCATTTCTATTCTGGGTTAGTTCAGAAATGTTACATTTATCCAAA | 240 |
|     |         | *****<br>S E E A N H F Y S G L V P E C Y I Y S K             |     |
| 374 |         |                                                              |     |
| 375 | SDDV_TH | TTTGACCCCGATATTATTACCAGAGTCAAGAAACGACAACACTAGAATTAACATCTAGAT | 300 |
|     | SDDV_SG | TTTGACCCCGATATTATTACCAGAGTCAAGAAACGACAACACTAGAATTAACATCTAGAT | 300 |
|     |         | *****<br>F D P D I I T R V K K R Q L E L K H L D             |     |
| 376 | SDDV_TH | CCTAAACATTCTGGCTCTTATTGGCCATCGATGATTGCATGGACAACACCAAAATGTTT  | 360 |
|     | SDDV_SG | CCTAAACATTCTGGCTCTTATTGGCTCATCGATGATTGCATGGACAACACCAAAATGTTT | 360 |
|     |         | *****<br>P K H S W L L L A/V I D D C M D N T K L F           |     |
| 377 | SDDV_TH | AATAATGAAGTAGTTGCTGATTTGTTTAAAAACGGTAGACATTGGAACCTTGTGGTCATT | 420 |
|     | SDDV_SG | AATAATGAAGTAGTTGCTGATTTGTTTAAAAACGGTAGACATTGGAACCTTGTGGTCATT | 420 |
|     |         | *****<br>N N E V V A D L F K N G R H W N L L V I             |     |
| 378 |         |                                                              |     |
| 379 | SDDV_TH | ATTGCTAGTCAGTACATTATGGATTTAAAAGCCGATTTAAGATGTTCAATAGATGGTGTA | 480 |
|     | SDDV_SG | ATTGCTAGTCAGTACATTATGGATTTAAAAGCCGATTTAAGATGTTCAATAGATGGTGTA | 480 |
|     |         | *****<br>I A S Q Y I M D L K A D L R C S I D G V             |     |
| 380 | SDDV_TH | TTTCTCTTTAGCGAATCTAATTTGACTAGTCAAGAGAAAATATACAAACAGTTTGAGGGT | 540 |
|     | SDDV_SG | TTTCTCTTTAGCGAATCTAATTTGACTAGTCAAGAGAAAATATACAAACAGTTTGAGGGT | 540 |
|     |         | *****<br>F L F S E S N L T S Q E K I Y K Q F G G             |     |
| 381 |         |                                                              |     |
| 382 | SDDV_TH | AAAATCCAAAGCCCTCAATTTATGCTACTTATGGAGAAAGTGACATTGGATTACACTTGT | 600 |
|     | SDDV_SG | AAAATCCAAAGCCCTCAATTTATGCTACTTATGGAGAAAGTGACATTGGATTACACTTGT | 600 |
|     |         | *****<br>K I P K P Q F M L L M E K V T L D Y T C             |     |
| 383 | SDDV_TH | CTCTACATCGACAACGCTAGCCAAACGCGACTGGACCGAATGCGTTCGATATTACAAG   | 660 |
|     | SDDV_SG | CTCTACATCGACAACGCTAGCCAAACGCGACTGGACCGAATGCGTTCGATATTACAAG   | 660 |
|     |         | *****<br>L Y I D N A S Q T Q H W T E C V R Y Y K             |     |
| 384 | SDDV_TH | GCACCTATGTTAACAAACGAGGATGTCAATTTGGTTTTGCAGATTATAAAAACAGCGCA  | 720 |
|     | SDDV_SG | GCACCTATGTTAACAAACGAGGATGTCAATTTGGTTTTGCAGATTATAAAAACAGCGCA  | 720 |
|     |         | *****<br>A P M L T N E D V N F G F A D Y K N S A             |     |
| 385 |         |                                                              |     |
| 386 | SDDV_TH | ATTGCTGTGTTGAATAA                                            | 738 |
|     | SDDV_SG | ATTGCTGTGTTGAATAA                                            | 738 |
|     |         | *****                                                        |     |

387 **Figure S1** Position of SDDV detection primers. Open reading frame sequences of SDDV *ATPase*  
388 gene from Thai (TH, MH152407) and Singapore (SG, KR139659) isolates retrieved from  
389 GenBank database were compared. Primers used in qPCR assay developed in this study and in  
390 semi-nested PCR described in Charoenwai et al. (2019) were gray-highlighted and underlined,  
391 respectively.

392



393

a) Gradient PCR

394

395

396

397

398

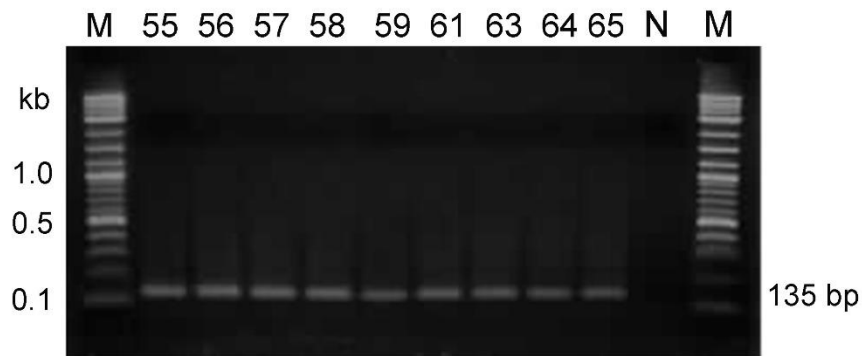

399

b) Melt curve of qPCR

400

401

402

403

404

405

406

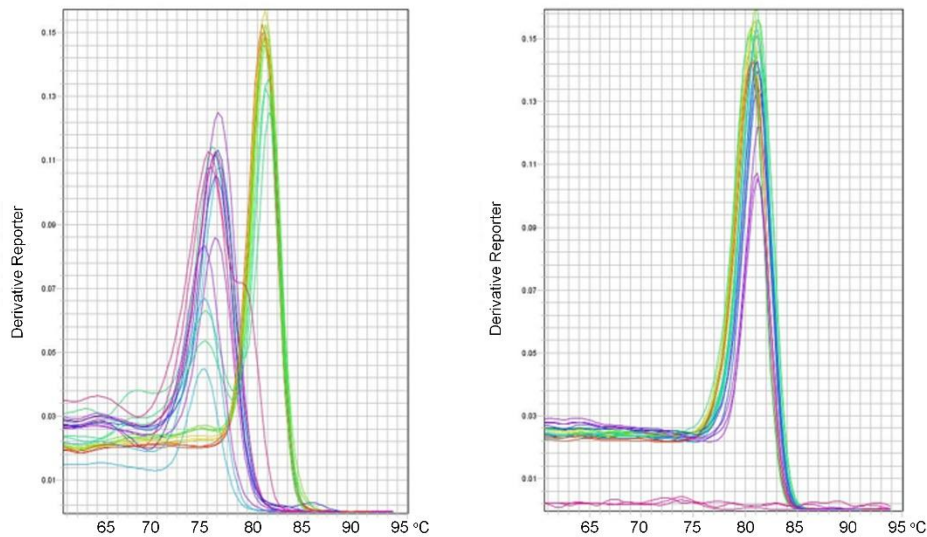

Conditions: Ta 60 or 63 °C  
primers 200 nM

Ta 63 °C  
primers 150 nM

408

409 **Figure S2** Optimizing the SDDV qPCR conditions. (a) Gradient conventional PCR using Ta at  
410 55-65 °C were performed with reactions containing SDDV-infected fish DNA and qSDDV-AF  
411 and qSDDV-AR primers. N, no template control. (b) Melt curve analysis of qPCR assays using Ta  
412 at 60 or 63 °C and primer concentration of 200 nM showing non-specific products (left) and  
413 conditions using Ta at 63 °C and primer concentration of 150 nM revealing uniform melt peaks  
414 (right).
